# Supplementary material for: A novel description of a syndrome consisting of 7q21.3 deletion including DYNC1I1 with preserved DLX5/6 without ectrodactyly: a case report
Source: PubMed Central journal article supplement (PMC4904365; doi:10.1186/s13256-016-0921-8), 2016-06-13
Supplement: 13256_2016_921_MOESM1_ESM.pdf [file 13256_2016_921_MOESM1_ESM.pdf]

## Greenwood Genetic Center

### CYTOGENETIC LABORATORY

125 Gregor Mendel Circle  
Greenwood, SC 29646  
1-800-473-9411 FAX  
864-941-8133

#### Patient Sample

|                                                                                                                                                         |                                                    |
|---------------------------------------------------------------------------------------------------------------------------------------------------------|----------------------------------------------------|
| Date of birth: 4/30/1971                                                                                                                                | Study #: 14-04296FWMS                              |
| Requested by: Edwin Francisco Herrera Paz, M.D.                                                                                                         | Type of Specimen: Peripheral blood                 |
| Reason for Request: Rule out Williams syndrome, Male with distinctive facial features during infancy, Broad forehead, Medial eyebrow flare, Periorbital | Test Requested: Fluorescence in situ hybridization |
| Referral ID#: N/A 0501 1971 02759                                                                                                                       | Collection Date: 3/12/2014                         |
|                                                                                                                                                         | Sample Received: 3/13/2014                         |
|                                                                                                                                                         | Test Request Received: 3/13/2014                   |
|                                                                                                                                                         | Date Reported: 3/19/2014                           |

#### Results & Interpretation

##### ISCN

**Nomenclature:** ish 7q11.23(ELNx2)

No evidence of a microdeletion in the Williams syndrome critical region was detected by FISH.

**Comment:** Fluorescence in situ hybridization (FISH) was performed using a probe specific for the elastin gene [ELN] in the Williams Syndrome Critical Region on chromosome 7 (Vysis #32-190041). In an individual that does not have the deletion, four signals will be detected- two signals on each chromosome 7. The signal at 7q11.23 is specific for the elastin gene, while the signal at 7q36 is the D7S427 Chromosome 7 control probe which facilitates identification of the chromosome 7 homologs.

In the present study, 25 of 25 metaphase spreads and 65 of 66 interphase nuclei examined produced four signals indicating that this region is not deleted.

Reviewed and electronically signed by  
Barbara R. DuPont, PhD, FACMG  
Senior Director, Cytogenetics Laboratory  
cc: Hector Miguel Ramos Zaldivar, M.S.
